# Supplementary material for: Investigation of Acupuncture Sensation Patterns under Sensory Deprivation Using a Geographic Information System
Source: Hindawi journal article supplement (doi:10.1155/2012/591304), 2012-01-01
Supplement: f1 [file 591304.f1.pdf]

## Supplementary Material

### Investigation of acupuncture sensation patterns under sensory deprivation using a geographic information system

Florian Beissner,<sup>1</sup> Irene Marzolff<sup>2</sup>

<sup>1</sup> Pain & Autonomics – Integrative Research (PAIR), University Clinic of Psychiatry and Psychotherapy, Friedrich Schiller University Jena, Germany

<sup>2</sup> Institute for Physical Geography, Goethe University, Frankfurt am Main, Germany

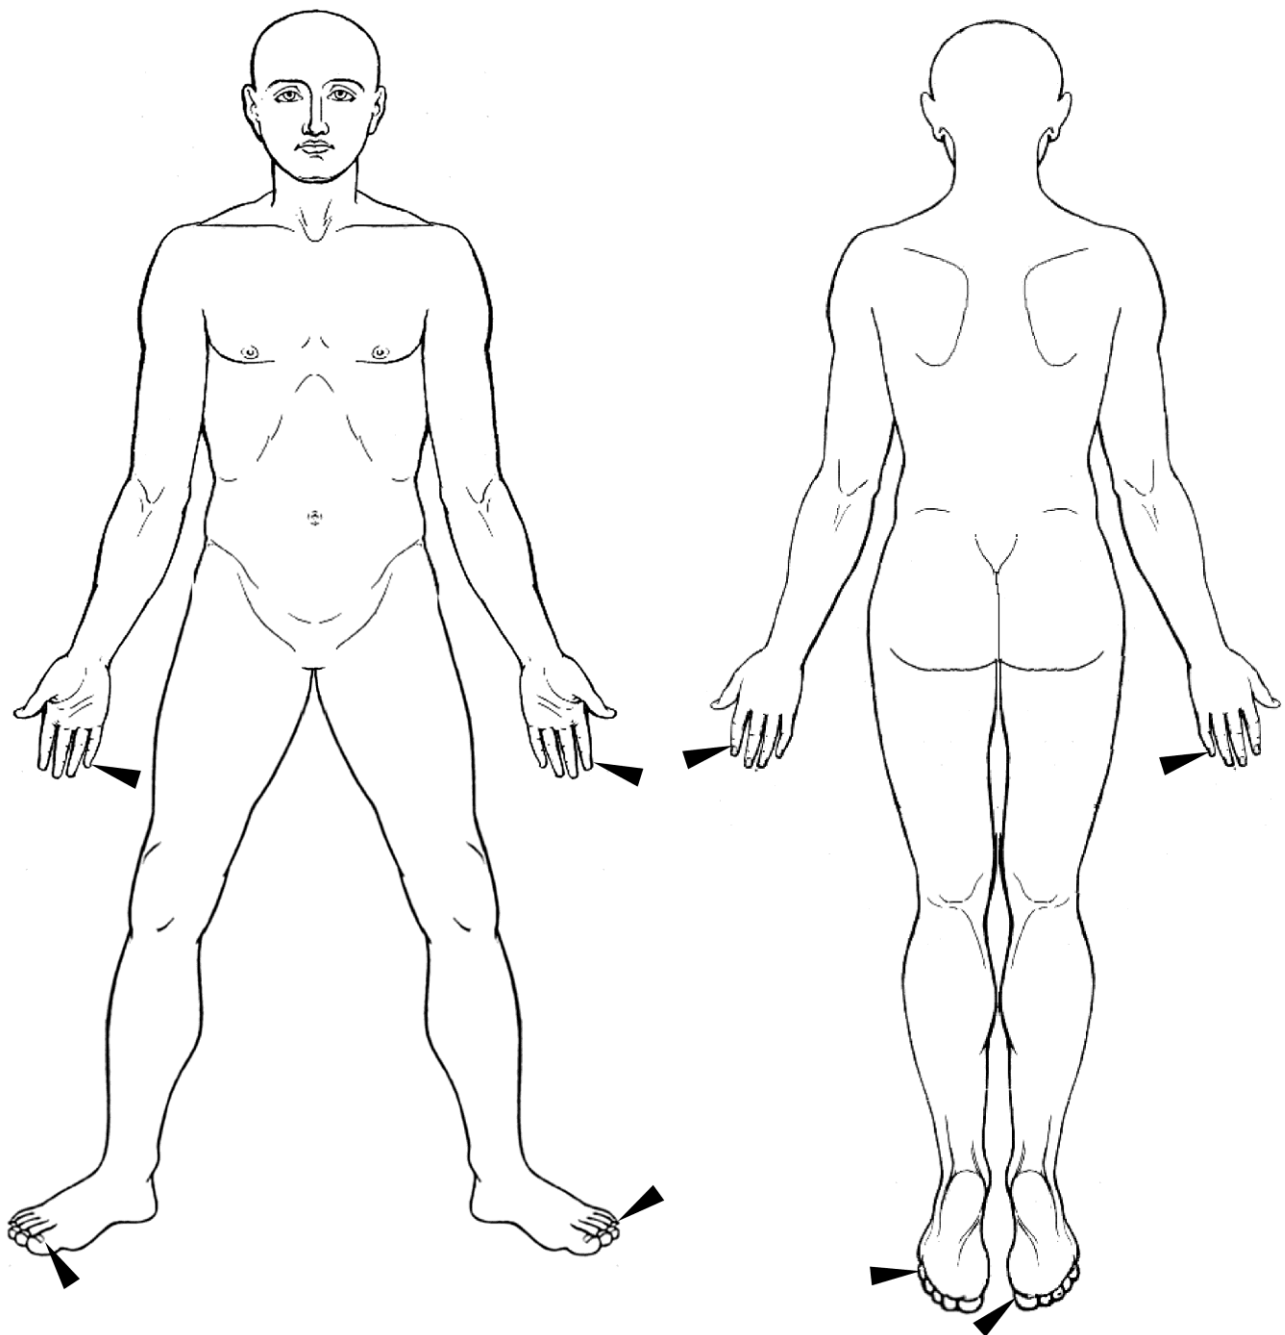

**Supplementary Figure 1:** The body scheme, that was used by the subjects to sketch their sensations during laser acupuncture. The arrow heads mark the points of stimulation.

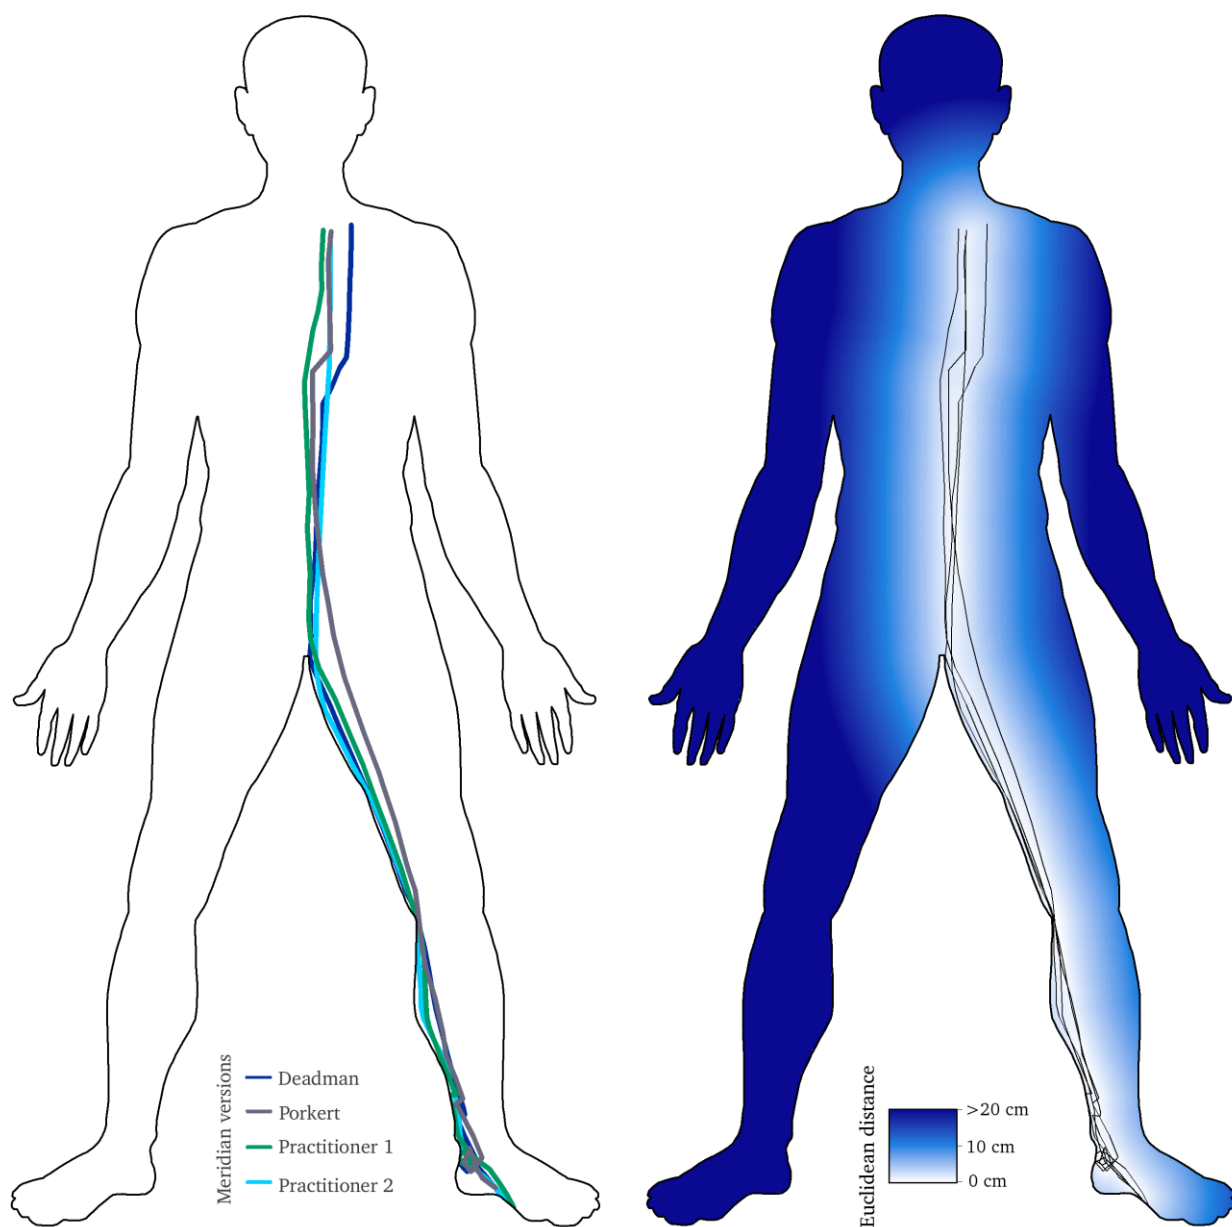

**Supplementary Figure 2:** Methodological approach to measure distances from a cohort of meridians. The left picture shows the variability of different sources concerning the course of the kidney (KI) meridian. The right picture shows the Euclidean distance field that was then intersected with the mean center lines (see Figure 3+4 and Table 3).

|         | Sensation intensity | point-like sensations |       |            | line-like sensations |       |            |                   | 2-dimensional sensations |       |                       |                             |
|---------|---------------------|-----------------------|-------|------------|----------------------|-------|------------|-------------------|--------------------------|-------|-----------------------|-----------------------------|
| Subject | VAS                 | front / back          | Index | Radius/ cm | front / back         | Index | Length/ cm | total Length / cm | front / back             | Index | Area/ cm <sup>2</sup> | total Area/ cm <sup>2</sup> |
| 1       | 6                   |                       |       |            |                      |       |            | 0.00              |                          |       |                       | 0.00                        |
| 2       | 21                  | b                     | I     | 1.60       | b                    | I     | 3.14       | 37.21             | b                        | I     | 8.28                  | 166.31                      |
|         |                     | b                     | II    | 0.50       | b                    | II    | 3.24       |                   | b                        | II    | 9.40                  |                             |
|         |                     | f                     | I     | 0.50       | b                    | III   | 3.19       |                   | b                        | III   | 64.82                 |                             |
|         |                     |                       |       |            | f                    | I     | 10.07      |                   | b                        | IV    | 8.39                  |                             |
|         |                     |                       |       |            | f                    | II    | 9.96       |                   | b                        | V     | 32.91                 |                             |
|         |                     |                       |       |            | f                    | III   | 2.57       |                   | b                        | VI    | 30.65                 |                             |
|         |                     |                       |       |            | f                    | IV    | 2.47       |                   | f                        | I     | 11.86                 |                             |
|         |                     |                       |       |            | f                    | V     | 2.58       |                   |                          |       |                       |                             |
| 3       | 39                  |                       |       |            | b                    | I     | 49.88      | 49.88             | b                        | I     | 31.56                 | 487.61                      |
|         |                     |                       |       |            |                      |       |            |                   | b                        | II    | 25.57                 |                             |
|         |                     |                       |       |            |                      |       |            |                   | b                        | III   | 41.91                 |                             |
|         |                     |                       |       |            |                      |       |            |                   | b                        | IV    | 47.07                 |                             |
|         |                     |                       |       |            |                      |       |            |                   | b                        | V     | 27.58                 |                             |
|         |                     |                       |       |            |                      |       |            |                   | f                        | I     | 156.88                |                             |
|         |                     |                       |       |            |                      |       |            |                   | f                        | II    | 157.03                |                             |
| 4       | 31                  | b                     | I     | 1.00       | b                    | I     | 7.98       | 7.98              | b                        | I     | 11.10                 | 206.01                      |
|         |                     | b                     | II    | 1.40       |                      |       |            |                   | b                        | II    | 11.65                 |                             |
|         |                     | b                     | III   | 1.00       |                      |       |            |                   | b                        | III   | 10.31                 |                             |
|         |                     | b                     | IV    | 1.60       |                      |       |            |                   | b                        | IV    | 8.74                  |                             |
|         |                     | f                     | I     | 1.00       |                      |       |            |                   | b                        | V     | 7.16                  |                             |
|         |                     | f                     | II    | 1.00       |                      |       |            |                   | f                        | I     | 39.67                 |                             |
|         |                     |                       |       |            |                      |       |            |                   | f                        | II    | 40.75                 |                             |
|         |                     |                       |       |            |                      |       |            |                   | f                        | III   | 76.62                 |                             |
| 5       | 42                  | b                     | I     | 1.20       | b                    | I     | 33.85      | 138.13            | b                        | I     | 24.09                 | 473.60                      |
|         |                     | b                     | II    | 1.00       | f                    | I     | 19.64      |                   | b                        | II    | 85.77                 |                             |
|         |                     | b                     | III   | 1.70       | f                    | II    | 15.24      |                   | f                        | I     | 363.74                |                             |
|         |                     | f                     | I     | 1.00       | f                    | III   | 9.00       |                   |                          |       |                       |                             |
|         |                     |                       |       |            | f                    | IV    | 24.66      |                   |                          |       |                       |                             |
|         |                     |                       |       |            | f                    | IX    | 5.37       |                   |                          |       |                       |                             |
|         |                     |                       |       |            | f                    | V     | 8.86       |                   |                          |       |                       |                             |
|         |                     |                       |       |            | f                    | VI    | 8.57       |                   |                          |       |                       |                             |
|         |                     |                       |       |            | f                    | VII   | 8.61       |                   |                          |       |                       |                             |
|         |                     |                       |       |            | f                    | VIII  | 4.36       |                   |                          |       |                       |                             |
| 6       | 37                  | b                     | I     | 0.70       | f                    | I     | 19.53      | 68.24             | b                        | I     | 259.18                | 340.64                      |
|         |                     | b                     | II    | 2.80       | f                    | II    | 14.48      |                   | b                        | II    | 81.46                 |                             |
|         |                     | f                     | I     | 0.70       | f                    | III   | 6.59       |                   |                          |       |                       |                             |
|         |                     |                       |       |            | f                    | IV    | 17.93      |                   |                          |       |                       |                             |
|         |                     |                       |       |            | f                    | V     | 3.68       |                   |                          |       |                       |                             |
|         |                     |                       |       |            | f                    | VI    | 3.54       |                   |                          |       |                       |                             |
|         |                     |                       |       |            | f                    | VII   | 2.48       |                   |                          |       |                       |                             |
| 7       | 72                  | b                     | I     | 1.00       | f                    | I     | 40.43      | 65.28             | b                        | I     | 14.75                 | 148.87                      |
|         |                     |                       |       |            | f                    | II    | 24.86      |                   | b                        | II    | 18.30                 |                             |
|         |                     |                       |       |            |                      |       |            |                   | b                        | III   | 26.17                 |                             |
|         |                     |                       |       |            |                      |       |            |                   | f                        | I     | 38.08                 |                             |
|         |                     |                       |       |            |                      |       |            |                   | f                        | II    | 7.86                  |                             |
|         |                     |                       |       |            |                      |       |            |                   | f                        | III   | 26.26                 |                             |
|         |                     |                       |       |            |                      |       |            |                   | f                        | IV    | 17.44                 |                             |
| 8       | 5                   | b                     | I     | 1.00       | b                    | I     | 6.67       | 12.97             | b                        | I     | 19.58                 | 41.16                       |
|         |                     | b                     | II    | 2.50       | f                    | I     | 6.30       |                   | f                        | I     | 13.91                 |                             |
|         |                     | f                     | I     | 0.90       |                      |       |            |                   | f                        | II    | 7.67                  |                             |
| 9       | 6                   | f                     | I     | 1.80       |                      |       |            | 0.00              |                          |       |                       | 0.00                        |

|      |       |   |     |      |   |     |       |        |   |     |        |        |
|------|-------|---|-----|------|---|-----|-------|--------|---|-----|--------|--------|
| 10   | 10    |   |     |      | b | I   | 15.54 | 15.54  | b | I   | 11.27  | 717.39 |
|      |       |   |     |      |   |     |       |        | b | II  | 399.50 |        |
|      |       |   |     |      |   |     |       |        | b | III | 7.34   |        |
|      |       |   |     |      |   |     |       |        | f | I   | 15.06  |        |
|      |       |   |     |      |   |     |       |        | f | II  | 284.22 |        |
| 11   | 14    | b | I   | 0.60 | f | I   | 39.77 | 39.77  | b | I   | 47.41  | 47.41  |
| 12   | 15    | b | I   | 0.90 |   |     |       | 0.00   |   |     |        | 0.00   |
| 13   | 18    | b | I   | 0.50 |   |     |       | 0.00   |   |     |        | 0.00   |
|      |       | b | II  | 1.00 |   |     |       |        |   |     |        |        |
|      |       | f | I   | 0.90 |   |     |       |        |   |     |        |        |
| 14   | 24    | b | I   | 0.70 | b | I   | 8.51  | 105.15 | b | I   | 24.34  | 24.34  |
|      |       |   |     |      | b | II  | 27.20 |        |   |     |        |        |
|      |       |   |     |      | f | I   | 14.73 |        |   |     |        |        |
|      |       |   |     |      | f | II  | 25.99 |        |   |     |        |        |
|      |       |   |     |      | f | III | 28.73 |        |   |     |        |        |
| 15   | 18    |   |     |      |   |     |       | 0.00   | b | I   | 128.35 | 409.74 |
|      |       |   |     |      |   |     |       |        | f | I   | 281.38 |        |
| 16   | 23    | b | I   | 4.50 | b | I   | 17.22 | 61.79  | b | I   | 8.63   | 8.63   |
|      |       | b | II  | 0.70 | b | II  | 6.64  |        |   |     |        |        |
|      |       | b | III | 1.60 | b | III | 8.47  |        |   |     |        |        |
|      |       | b | IV  | 5.00 | b | IV  | 11.27 |        |   |     |        |        |
|      |       | b | V   | 4.50 | b | V   | 9.76  |        |   |     |        |        |
|      |       | b | VI  | 4.50 | b | VI  | 8.41  |        |   |     |        |        |
|      |       | b | VII | 4.50 |   |     |       |        |   |     |        |        |
|      |       | f | I   | 4.00 |   |     |       |        |   |     |        |        |
| 17   | 69    | b | I   | 1.20 | b | I   | 4.97  | 47.22  | b | I   | 16.48  | 361.24 |
|      |       | b | II  | 2.00 | b | II  | 37.75 |        | b | II  | 55.08  |        |
|      |       | b | III | 0.50 | b | III | 4.50  |        | b | III | 193.61 |        |
|      |       |   |     |      |   |     |       |        | f | I   | 96.07  |        |
| mean | 26.47 |   |     | 1.67 |   |     | 13.81 | 40.50  |   |     | 67.31  | 201.94 |

**Supplementary Table 1:** Numeric results of the GIS analysis of acupuncture sensation patterns. Sensation intensities are also shown. The index counts disjunct sensation patterns of the same type for each subject. For line-like and 2-dimensional sensations, "total length" and "total area" indicate the sum of all disjunct patterns.
